# Supplementary material
Source: PubMed Central journal article supplement (PMC7027993)
Supplement: NIHMS1557830-supplement-supporting_info.pdf [file NIHMS1557830-supplement-supporting_info.pdf]

## Supplementary Information

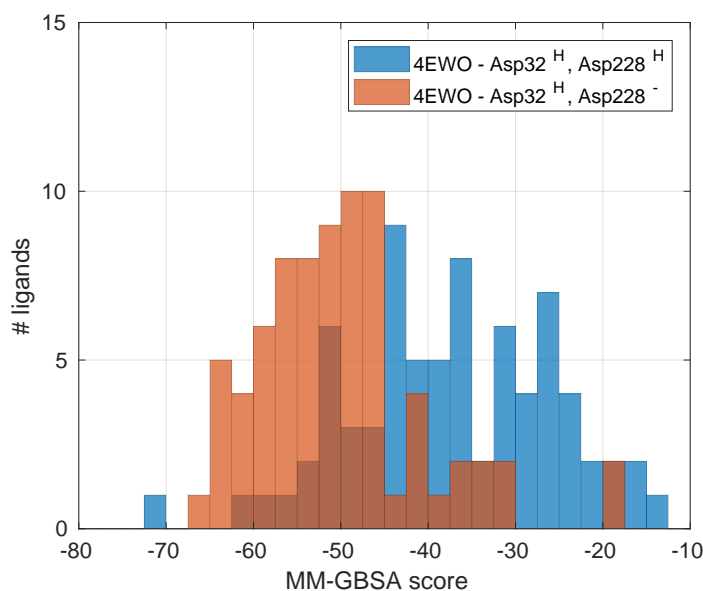

**Fig. S1** Distribution of the calculated MM-GBSA scores for different protonation states of the receptor 4EWO. Overall, the single protonation state (Asp32<sup>H</sup>, Asp228<sup>-</sup>) resulted in lower MM-GBSA scores than the double protonation state (Asp32<sup>H</sup>, Asp228<sup>H</sup>).

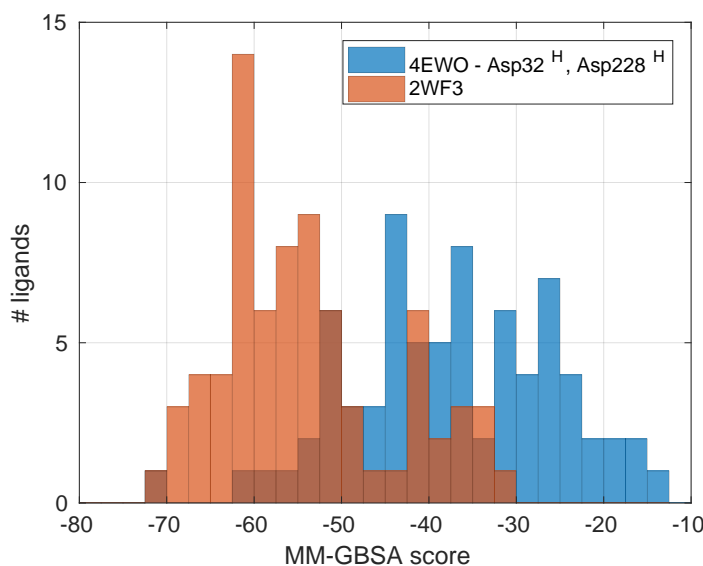

**Fig. S2** Distribution of the calculated MM-GBSA scores for the two receptor conformations - 4EWO and 2WF3 for the same set of 75 ligands. In general, the receptor 2WF3 resulted in lower MM-GBSA scores than 4EWO.
